# Supplementary material for: A Transmission Model for the Ecology of an Avian Blood Parasite in a Temperate Ecosystem
Source: PLoS One. 2013 Sep 20;8(9):e76126. doi: 10.1371/journal.pone.0076126 (PMC3779181; doi:10.1371/journal.pone.0076126)
Supplement: Text S3 — Differential equations for the multi-season model. (DOC) [file pone.0076126.s003.doc]

**Text S3**

*Differential Equations for the Extended, Multiple Season Model of the Bird (B) and Black Fly (F) populations*

1. First year birds: nestlings (*N*) and feathered juveniles (*J*)

*susceptible nude nestlings*

*susceptible juveniles*

*exposed juveniles*

*acutely infectious juveniles*

*chronically infectious juveniles*

1. Adult birds (*A*)

*susceptible adult birds*

*exposed adult birds*

*acutely infectious adult birds*

*chronic infectious adult birds*

*relapsing infectious adult birds*

1. Black flies (*F*)

*susceptible black flies*

*exposed black flies*

*infectious black flies*

1. Ovens and overwintering bird populations

*susceptible YOY bird overwintering oven*

*susceptible adult bird overwintering oven*

*latently infected YOY bird overwintering oven*

*latently infected adult bird oven*
